# Supplementary material for: Adsorptive Performance of Polypyrrole-Based KOH-Activated Carbon for the Cationic Dye Crystal Violet: Kinetic and Equilibrium Studies
Source: Hindawi journal article supplement (doi:10.1155/2021/5527594), 2021-01-01
Supplement: f1 [file 5527594.f1.docx]

**Adsorptive Performance of Polypyrrole-based KOH-activated Carbon for the Cationic Dye Crystal Violet: Kinetic and Equilibrium Studies**

Abdulaziz Ali Alghamdi1, Abdel-Basit Al-Odayni1,2, Naaser A. Y. Abduh1, Safiah A. Alramadhan1, Mashael T. Aljboar1, and Waseem Sharaf Saeed1,2

1. Department of Chemistry, College of Science, King Saud University, P.O. Box 2455, Riyadh 11451, Saudi Arabia
2. Engineer Abdullah Bugshan Research Chair for Dental and Oral Rehabilitation, College of Dentistry, King Saud University, Riyadh 11545, Saudi Arabia

**E-mail:** [aalodayni@ksu.edu.sa](mailto:aalodayni@ksu.edu.sa)


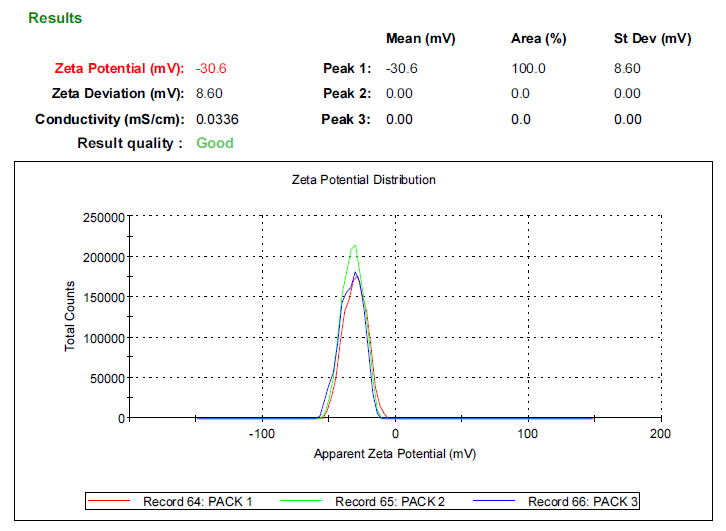


Figure S 1. Zeta potential measurement of PACK dispersed in water (1 mg/mL) at 25 °C without pH adjustment.

Table S 1. Parameters of the two-stage intraparticle diffusion (IPD) model

| C0 (mg/L) | qe-exp (mg/g) | IPD1 | | | IPD2 | | |
| --- | --- | --- | --- | --- | --- | --- | --- |
| kid1 (mg/(g.min0.5)) | C1 (mg/g) | R12 | kid2 (mg/(g.min0.5)) | C2 (mg/g) | R22 |
| 15 | 75.77 | - | - | - | - | - | - |
| 45 | 168.19 | 11.10 | 117.72 | 0.9222 | 1.632 | 152.37 | 0.9332 |
